# Supplementary material
Source: Springer Nature journal article supplement (https://www.springermedizin.de/resource/supplementary/12943_2009_644_MOESM7_ESM.pdf/9554472)

4,000 EGFP-8MGBA cells with:

A

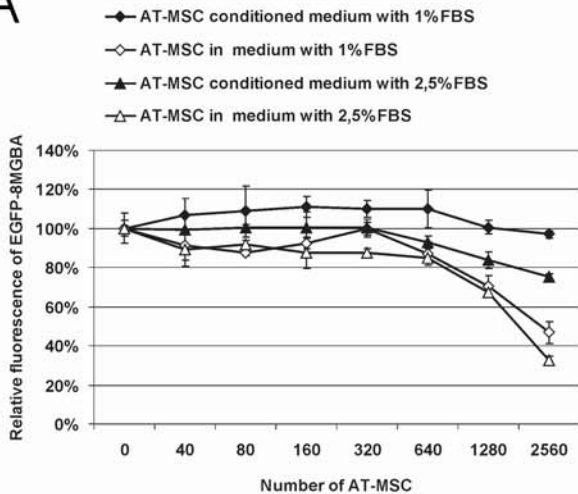

B

| Tumor incidence                 |        |        |
|---------------------------------|--------|--------|
| Treatment                       | Day 35 | Day 55 |
| 1.5E6 8MGBA s.c.                | 2/5    | 3/5    |
| 1E5 AT-MSC + 1.5E6 8MGBA s.c.   | 1/3    | 1/3    |
| 1E6 AT-MSC + 1.5E6 8MGBA s.c.   | 0/6    | 1/6    |
| 1E7 8MGBA s.c.                  | 5/5    | 5/5    |
| 1E6 AT-MSC i.v.+ 1E7 8MGBA s.c. | 3/8    | 3/8*   |

C

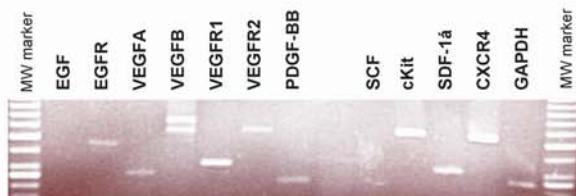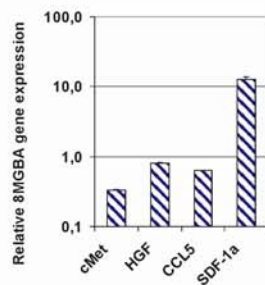

D

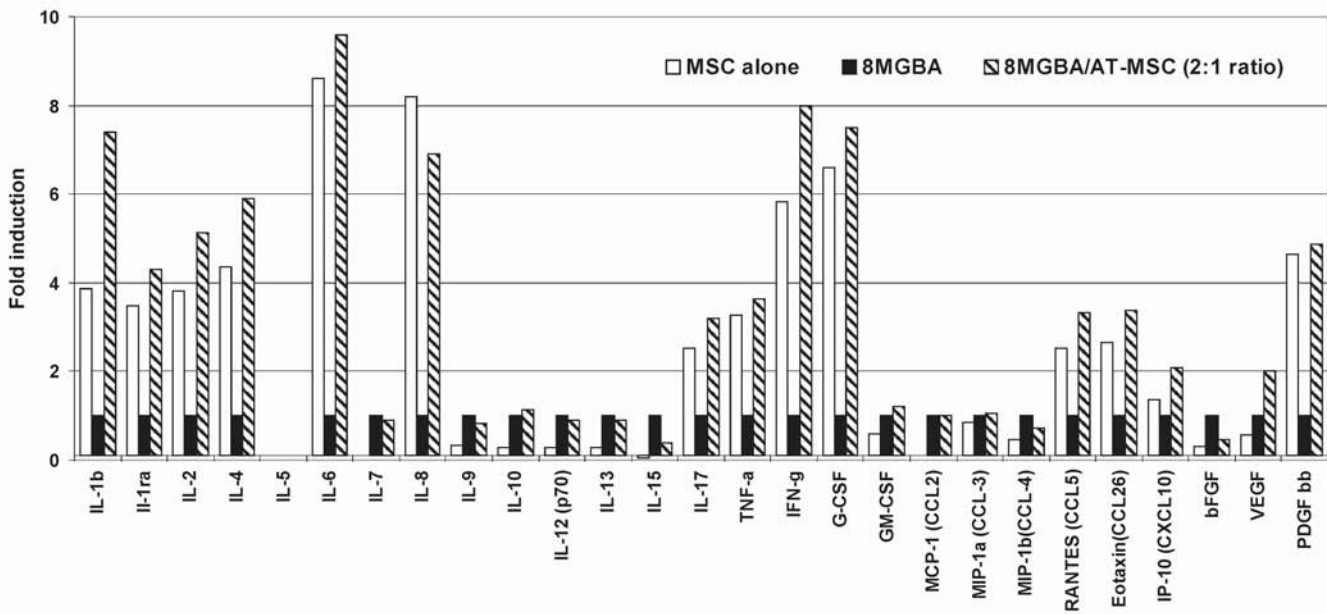

Supplement: MOESM7 [file 9554472]
